# Supplementary material for: Trinuclear cationic silver nanoclusters based-on bis-(phosphine) ligands and stabilized by CF3SO3−anions
Source: Royal Society of Chemistry journal article supplement (doi:10.1039/d1nj00873k), 2021-01-01
Supplement: d1nj00873k1.pdf [file d1nj00873k1.pdf]

## Supporting Information

5

### Trinuclear Cationic Silver Nanoclusters Based-on Bis-(phosphine) Ligands and Stabilized by $\text{CF}_3\text{SO}_3^-$ Anions

10 **Chu-Xia Han,<sup>a</sup> Zi-Mo Shao,<sup>a</sup> Li Li,<sup>a</sup> Kun Zhou,<sup>\*a</sup> Chun-Hui Xue,<sup>a</sup> Bao-Kuan Chen,<sup>a</sup> Jiu-Yu Ji<sup>a</sup> and Yan-Feng Bi<sup>\*a</sup>**

*School of Chemistry and Materials Science, Liaoning Shihua University, Fushun, Liaoning 113001, China. Tel/Fax: (+86) -24-56861709; E-mail:*

*[zhouk800@aliyun.com](mailto:zhouk800@aliyun.com); [biyanfeng@lnpu.edu.cn](mailto:biyanfeng@lnpu.edu.cn)*

15

### Table of contents

|    |                                      |               |
|----|--------------------------------------|---------------|
| 20 | <b>1. Crystallographic data.....</b> | <b>S2-S6</b>  |
|    | <b>2. Physical Measurements.....</b> | <b>S7-S13</b> |

## 1. Crystallographic data

**Table S1. Crystal data, data collection and structure refinement details for compounds 1-3**

| Compound                                                        | 1                                                                                                           | 2                                                                                                           | 3                                                                                                                                          |
|-----------------------------------------------------------------|-------------------------------------------------------------------------------------------------------------|-------------------------------------------------------------------------------------------------------------|--------------------------------------------------------------------------------------------------------------------------------------------|
| Empirical formula                                               | C <sub>83</sub> H <sub>75</sub> Ag <sub>3</sub> F <sub>6</sub> O <sub>6</sub> P <sub>6</sub> S <sub>2</sub> | C <sub>78</sub> H <sub>72</sub> Ag <sub>3</sub> F <sub>3</sub> O <sub>8</sub> P <sub>6</sub> S <sub>1</sub> | C <sub>85</sub> H <sub>87</sub> Ag <sub>3</sub> Cl <sub>2</sub> F <sub>3</sub> N <sub>3</sub> O <sub>6</sub> P <sub>6</sub> S <sub>1</sub> |
| Formula weight                                                  | 1855.98                                                                                                     | 1735.84                                                                                                     | 1915.96                                                                                                                                    |
| Crystal system                                                  | Orthorhombic                                                                                                | Monoclinic                                                                                                  | Monoclinic                                                                                                                                 |
| Space group                                                     | Pnma                                                                                                        | P2 <sub>1</sub> /m                                                                                          | P2 <sub>1</sub> /c                                                                                                                         |
| <i>a</i> (Å)                                                    | 19.9123(18)                                                                                                 | 13.0670(6)                                                                                                  | 19.7589(14)                                                                                                                                |
| <i>b</i> (Å)                                                    | 20.9620(18)                                                                                                 | 22.5859(11)                                                                                                 | 23.1840(16)                                                                                                                                |
| <i>c</i> (Å)                                                    | 19.6197(17)                                                                                                 | 14.0988(6)                                                                                                  | 18.9443(15)                                                                                                                                |
| <i>α</i> (Å)                                                    | 90                                                                                                          | 90                                                                                                          | 90                                                                                                                                         |
| <i>β</i> (Å)                                                    | 90                                                                                                          | 114.9290(10)                                                                                                | 94.853(2)                                                                                                                                  |
| <i>γ</i> (Å)                                                    | 90                                                                                                          | 90                                                                                                          | 90                                                                                                                                         |
| V (Å <sup>3</sup> )                                             | 8189.3(12)                                                                                                  | 3773.3 (3)                                                                                                  | 8647.1(11)                                                                                                                                 |
| Z                                                               | 4                                                                                                           | 2                                                                                                           | 4                                                                                                                                          |
| D/g cm <sup>-3</sup>                                            | 1.505                                                                                                       | 1.528                                                                                                       | 1.472                                                                                                                                      |
| <i>μ</i> /mm <sup>-1</sup>                                      | 0.943                                                                                                       | 0.987                                                                                                       | 0.928                                                                                                                                      |
| <i>F</i> (000)                                                  | 3752                                                                                                        | 1756                                                                                                        | 3896                                                                                                                                       |
| Reflection collected                                            | 58162                                                                                                       | 32189                                                                                                       | 75082                                                                                                                                      |
| Unique reflections                                              | 6635                                                                                                        | 6853                                                                                                        | 15350                                                                                                                                      |
| Parameters                                                      | 562                                                                                                         | 509                                                                                                         | 988                                                                                                                                        |
| <i>R</i> <sub>int</sub>                                         | 0.0696                                                                                                      | 0.0269                                                                                                      | 0.0583                                                                                                                                     |
| GOF                                                             | 1.045                                                                                                       | 1.094                                                                                                       | 1.008                                                                                                                                      |
| <i>R</i> <sub>1</sub> <sup>a</sup> [ <i>I</i> > 2σ( <i>I</i> )] | 0.0540                                                                                                      | 0.0366                                                                                                      | 0.0388                                                                                                                                     |
| <i>wR</i> <sub>2</sub> <sup>b</sup> (all data)                  | 0.1383                                                                                                      | 0.0882                                                                                                      | 0.1026                                                                                                                                     |

$$^a R_1 = \sum ||F_o| - |F_c|| / \sum |F_o|; \quad ^b wR_2 = \{ \sum [w(F_o^2 - F_c^2)^2] / \sum [w(F_o^2)^2] \}^{1/2}$$

**Table S2. Selected bond distances (Å) data for 1**

| Bond         | Bond distance (Å) | Bond       | Bond distance (Å) |
|--------------|-------------------|------------|-------------------|
| Ag(1)-C(1)   | 2.243(9)          | Ag(1)-P(1) | 2.4922(17)        |
| Ag(2)-C(1)   | 2.325(7)          | Ag(2)-P(2) | 2.4559(16)        |
| C(1)-Ag(2)#1 | 2.325(7)          | Ag(2)-P(3) | 2.4722(15)        |
| Ag(1)-P(1)#1 | 2.4922(17)        |            |                   |

Symmetry transformations used to generate equivalent atoms: #1 x, -y+3/2, z.

**Table S3. Ag $\cdots$ Ag interactions (Å) data for 1**

| Bond          | Bond distance (Å) | Bond          | Bond distance (Å) |
|---------------|-------------------|---------------|-------------------|
| Ag(1)-Ag(2)#1 | 3.1442(7)         | Ag(2)-Ag(2)#1 | 3.1669(9)         |
| Ag(1)-Ag(2)   | 3.1441(8)         |               |                   |

Symmetry transformations used to generate equivalent atoms: #1 x, -y+3/2, z.

5

**Table S4. Selected bond angle (°) data for 1**

| Bond              | Bond angle (°) | Bond             | Bond angle (°) |
|-------------------|----------------|------------------|----------------|
| C(1)-Ag(1)-P(1)#1 | 120.90(6)      | C(7)-P(1)-Ag(1)  | 117.5(2)       |
| C(1)-Ag(1)-P(1)   | 120.89(6)      | C(13)-P(1)-Ag(1) | 115.2(3)       |
| P(1)#1-Ag(1)-P(1) | 115.54(8)      | C(31)-P(1)-Ag(1) | 113.3(2)       |
| C(1)-Ag(2)-P(2)   | 118.39(18)     | C(25)-P(2)-Ag(2) | 115.3(3)       |
| C(1)-Ag(2)-P(3)   | 109.9(2)       | C(19)-P(2)-Ag(2) | 113.3(2)       |
| P(2)-Ag(2)-P(3)   | 123.19(5)      | C(31)-P(2)-Ag(2) | 115.8(2)       |
| C(2)-C(1)-Ag(1)   | 141.7(8)       | C(38)-P(3)-Ag(2) | 117.4(2)       |
| C(2)-C(1)-Ag(2)   | 119.6(5)       | C(32)-P(3)-Ag(2) | 111.2(2)       |
| C(2)-C(1)-Ag(2)#1 | 119.6(5)       | C(44)-P(3)-Ag(2) | 113.8(3)       |

Symmetry transformations used to generate equivalent atoms: #1 x, -y+3/2, z.

**Table S5. Selected bond distances (Å) data for 2**

| Bond         | Bond distance (Å) | Bond       | Bond distance (Å) |
|--------------|-------------------|------------|-------------------|
| Ag(1)-P(2)#1 | 2.4392(8)         | Ag(2)-P(3) | 2.4673(9)         |
| Ag(1)-P(2)   | 2.4392(9)         | Ag(2)-P(1) | 2.4697(9)         |
| Ag(1)-O(1)   | 2.58(2)           |            |                   |

Symmetry transformations used to generate equivalent atoms: #1 x, -y+1/2.

**Table S6. Ag $\cdots$ Ag interactions (Å) data for 2**

| Bond          | Bond distance (Å) | Bond          | Bond distance (Å) |
|---------------|-------------------|---------------|-------------------|
| Ag(1)-Ag(2)#1 | 2.9572(4)         | Ag(2)-Ag(2)#1 | 3.1466(5)         |
| Ag(1)-Ag(2)   | 2.9572(4)         |               |                   |

Symmetry transformations used to generate equivalent atoms: #1 x, -y+1/2, z.

10

**Table S7. Selected bond angle (°) data for 2**

| Bond              | Bond angle (°) | Bond             | Bond angle (°) |
|-------------------|----------------|------------------|----------------|
| P(2)#1-Ag(1)-P(2) | 124.74(4)      | P(2)-Ag(1)-O(1)  | 94.10(17)      |
| P(3)-Ag(2)-P(1)   | 124.37(3)      | C(14)-P(2)-Ag(1) | 118.34(12)     |
| C(1)-P(1)-Ag(2)   | 112.10(12)     | C(26)-P(2)-Ag(1) | 110.66(11)     |
| C(7)-P(1)-Ag(2)   | 113.12(12)     | C(27)-P(3)-Ag(2) | 115.19(11)     |
| C(13)-P(1)-Ag(2)  | 115.38(14)     | C(33)-P(3)-Ag(2) | 114.17(11)     |
| C(20)-P(2)-Ag(1)  | 114.54(13)     | C(26)-P(3)-Ag(2) | 112.86(11)     |
| P(2)#1-Ag(1)-O(1) | 94.10(17)      |                  |                |

Symmetry transformations used to generate equivalent atoms: #1 x, -y+1/2, z.

**Table S8. Selected bond distances (Å) data for 3**

| Bond        | Bond distance (Å) | Bond        | Bond distance (Å) |
|-------------|-------------------|-------------|-------------------|
| Ag(1)-P(1)  | 2.4600(9)         | Ag(2)-Cl(2) | 2.7243(9)         |
| Ag(1)-P(6)  | 2.4705(9)         | Ag(2)-Cl(1) | 2.8118(10)        |
| Ag(1)-Cl(1) | 2.7385(10)        | Ag(3)-P(4)  | 2.4433(9)         |
| Ag(1)-Cl(2) | 2.7617(10)        | Ag(3)-P(5)  | 2.4540(9)         |
| Ag(2)-P(3)  | 2.4361(9)         | Ag(3)-Cl(1) | 2.7040(10)        |
| Ag(2)-P(2)  | 2.4487(9)         | Ag(3)-Cl(2) | 2.7095(10)        |

**Table S9. Ag...Ag interactions (Å) data for 3**

| Bond        | Bond distance (Å) | Bond        | Bond distance (Å) |
|-------------|-------------------|-------------|-------------------|
| Ag(2)-Ag(3) | 3.2462(4)         | Ag(1)-Ag(3) | 3.5552(7)         |
| Ag(1)-Ag(2) | 3.3923(6)         |             |                   |

5

**Table S10. Selected bond angle (°) data for 3**

| Bond              | Bond angle (°) | Bond             | Bond angle (°) |
|-------------------|----------------|------------------|----------------|
| P(1)-Ag(1)-P(6)   | 137.60(3)      | C(8)-P(1)-Ag(1)  | 116.82(13)     |
| P(1)-Ag(1)-Cl(1)  | 111.41(3)      | C(2)-P(1)-Ag(1)  | 115.17(12)     |
| P(6)-Ag(1)-Cl(1)  | 103.42(3)      | C(1)-P(1)-Ag(1)  | 112.38(12)     |
| P(1)-Ag(1)-Cl(2)  | 103.39(3)      | C(14)-P(2)-Ag(2) | 119.06(12)     |
| P(6)-Ag(1)-Cl(2)  | 101.23(3)      | C(1)-P(2)-Ag(2)  | 114.31(12)     |
| Cl(1)-Ag(1)-Cl(2) | 87.94(3)       | C(20)-P(2)-Ag(2) | 109.03(12)     |
| P(3)-Ag(2)-P(2)   | 122.25(3)      | C(33)-P(3)-Ag(2) | 117.80(13)     |
| P(3)-Ag(2)-Cl(2)  | 129.17(3)      | C(26)-P(3)-Ag(2) | 115.68(11)     |
| P(2)-Ag(2)-Cl(2)  | 96.02(3)       | C(27)-P(3)-Ag(2) | 109.19(12)     |
| P(3)-Ag(2)-Cl(1)  | 95.07(3)       | C(39)-P(4)-Ag(3) | 116.27(13)     |
| P(2)-Ag(2)-Cl(1)  | 124.73(3)      | C(45)-P(4)-Ag(3) | 113.61(12)     |
| Cl(2)-Ag(2)-Cl(1) | 87.21(3)       | C(26)-P(4)-Ag(3) | 113.68(12)     |
| P(4)-Ag(3)-P(5)   | 130.44(3)      | C(52)-P(5)-Ag(3) | 111.72(12)     |
| P(4)-Ag(3)-Cl(1)  | 103.87(3)      | C(58)-P(5)-Ag(3) | 113.07(13)     |
| P(5)-Ag(3)-Cl(1)  | 111.81(3)      | C(51)-P(5)-Ag(3) | 117.36(11)     |
| P(4)-Ag(3)-Cl(2)  | 117.17(3)      | C(64)-P(6)-Ag(1) | 117.79(13)     |
| P(5)-Ag(3)-Cl(2)  | 96.68(3)       | C(70)-P(6)-Ag(1) | 111.93(12)     |
| Cl(1)-Ag(3)-Cl(2) | 89.72(3)       | C(51)-P(6)-Ag(1) | 115.32(11)     |

**Table S11. Synthesis methods contrasted for compounds 1-3**

|            | Dppm                   | CF <sub>3</sub> SO <sub>3</sub> Ag | Second ligand                                                 | Na <sub>2</sub> MoO <sub>4</sub> /KMnO <sub>4</sub>        | NaBH <sub>4</sub> | Solvent                                                                                     |
|------------|------------------------|------------------------------------|---------------------------------------------------------------|------------------------------------------------------------|-------------------|---------------------------------------------------------------------------------------------|
| Compound 1 | 23.3 mg<br>0.0606 mmol | 30.3 mg<br>0.118 mmol              | <sup>t</sup> BuC≡Cag<br>11.6 mg<br>0.0614 mmol                | Na <sub>2</sub> MoO <sub>4</sub><br>11.2 mg<br>0.0500 mmol | 500 μL            | CH <sub>3</sub> OH-CH <sub>2</sub> Cl <sub>2</sub><br>(V : V = 1 : 1)<br>5 mL               |
| Compound 2 | 47.3 mg<br>0.123 mmol  | 63.4 mg<br>0.247 mmol              | <sup>t</sup> BuSAg<br>24.1mg<br>0.122 mmol                    | Na <sub>2</sub> MoO <sub>4</sub><br>23.8 mg<br>0.116 mmol  | 500 μL            | CH <sub>3</sub> OH-CH <sub>2</sub> Cl <sub>2</sub><br>(V : V = 1 : 1)<br>5 mL               |
| Compound 3 | 38.3 mg<br>0.0996 mmol | 22.6 mg,<br>0.0880 mmol            | MeOC <sub>6</sub> H <sub>4</sub> SAg<br>49.8 mg<br>0.202 mmol | KMnO <sub>4</sub><br>2.90 mg<br>0.0184 mmol                | -                 | CH <sub>3</sub> OH-CH <sub>2</sub> Cl <sub>2</sub> -DMF<br>(V : V : V = 1 : 1 : 1)<br>15 mL |

Notes: “-” indicates it has not been involved.

5 **Table S12. The pH values and Ag···Ag interactions (Å) data for compounds 1-3**

|            | pH<br>(before reaction) | pH<br>(after reaction) | Bond (Average distance (Å)) | Ag···Ag interactions (Å) |
|------------|-------------------------|------------------------|-----------------------------|--------------------------|
| Compound 1 | 5.1                     | 6.7                    | Ag-C (2.298 Å)              | 3.1441(8)-3.1669(9) Å    |
| Compound 2 | 3.5                     | 3.0                    | Ag-O (2.743 Å)              | 2.9572(4)-3.1466(5) Å    |
| Compound 3 | 5.0                     | 6.0                    | Ag-Cl (2.742 Å)             | 3.2462(4)-3.5552(7) Å    |

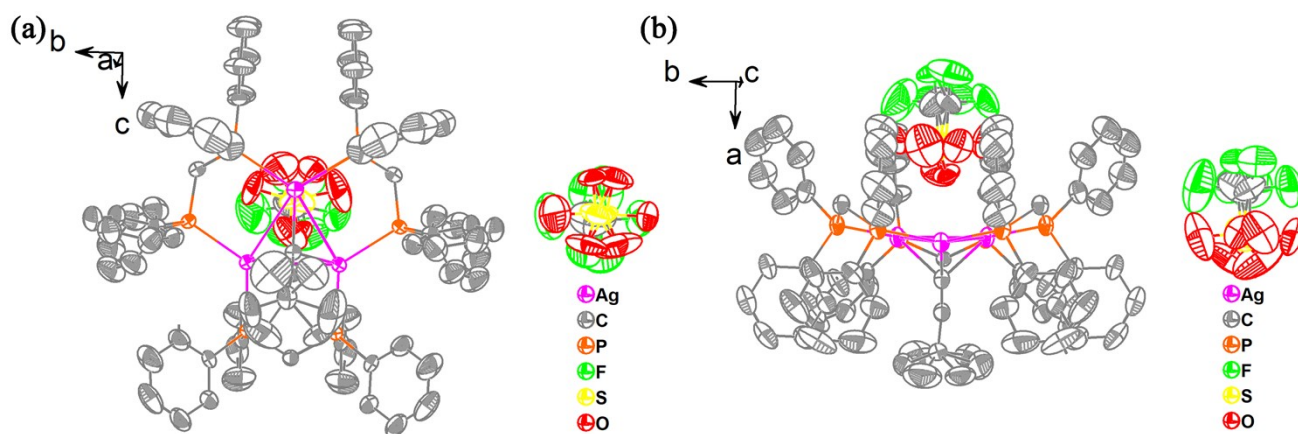

Fig. S1 Ellipsoid representations of compound 1. All the hydrogen atoms are omitted.

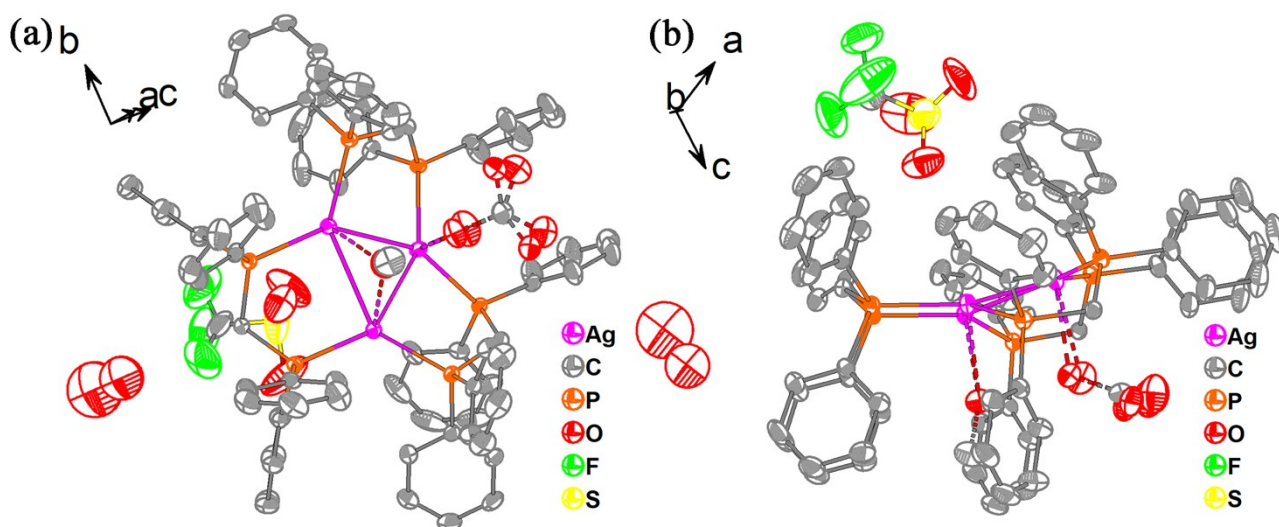

5

Fig. S2 Ellipsoid representations of compound 2. All the hydrogen atoms are omitted.

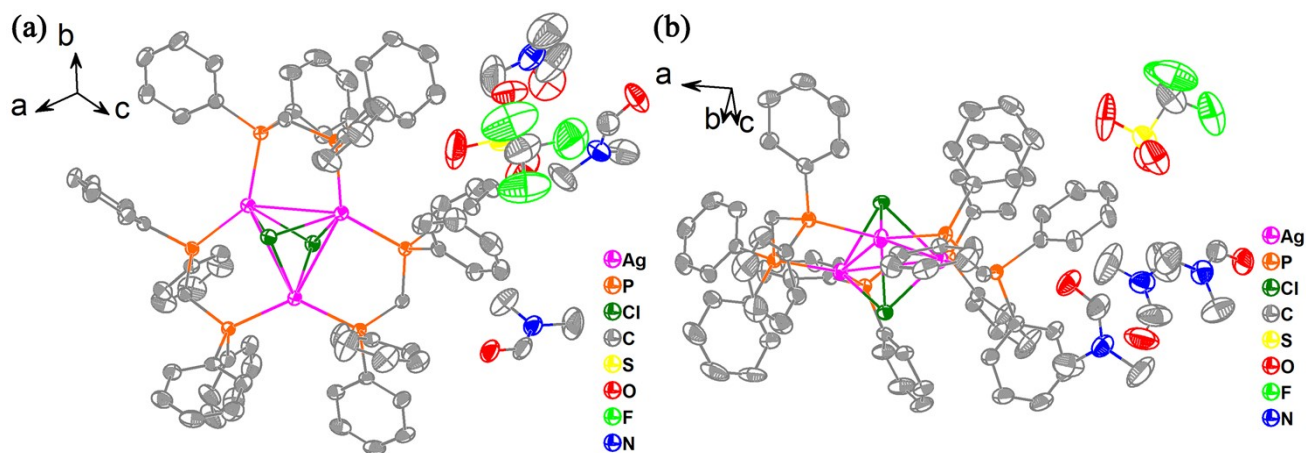

Fig. S3 Ellipsoid representations of compound 3. All the hydrogen atoms are omitted.

## 2. Physical Measurements

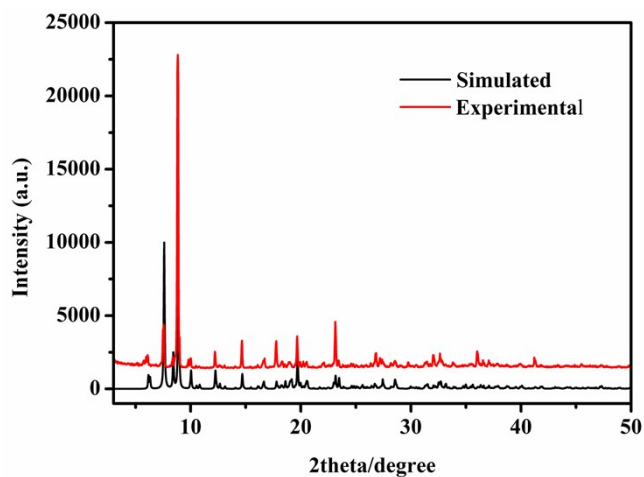

**Fig. S4** Experimental and simulated powder X-ray diffraction patterns of compound 1.

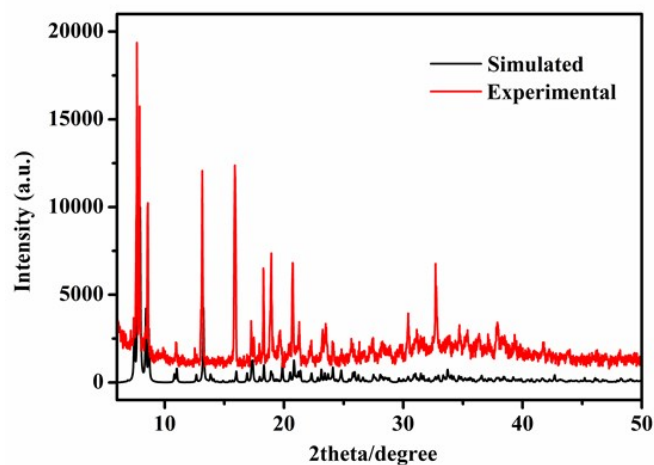

5 **Fig. S5** Experimental and simulated powder X-ray diffraction patterns of compound 2.

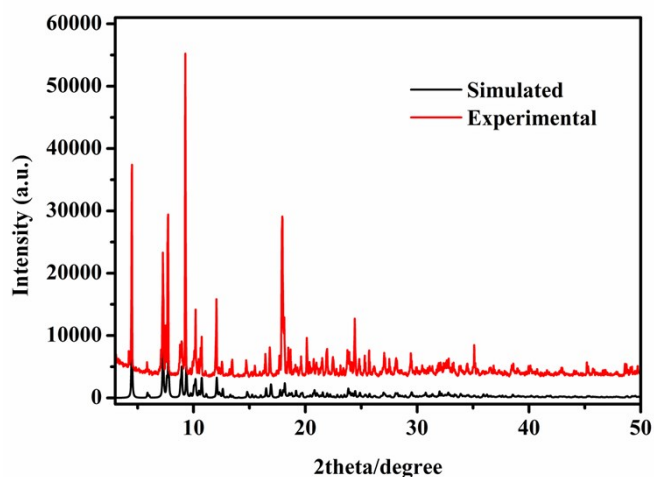

**Fig. S6** Experimental and simulated powder X-ray diffraction patterns of compound 3.

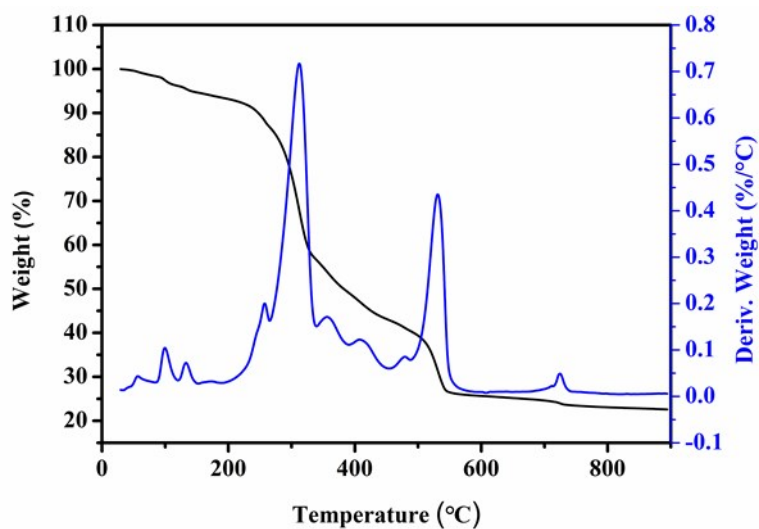

**Fig. S7** TGA/DSC curve of compound **1** (in N<sub>2</sub>).

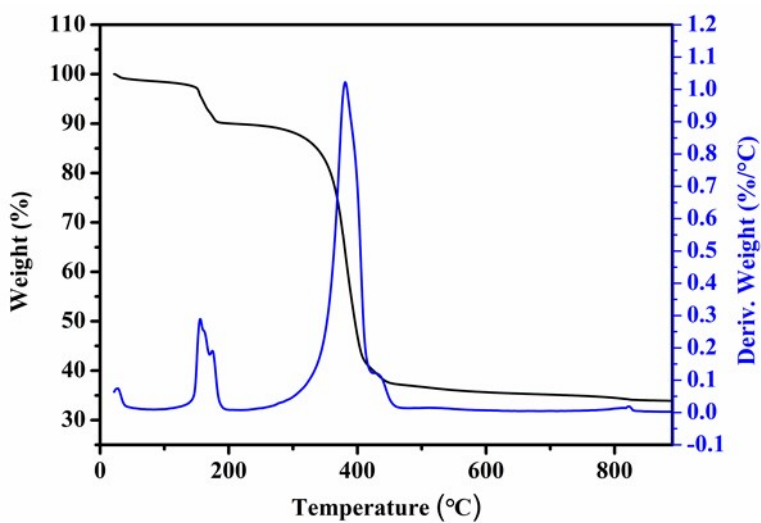

**Fig. S8** TGA/DSC curve of compound **2** (in N<sub>2</sub>).

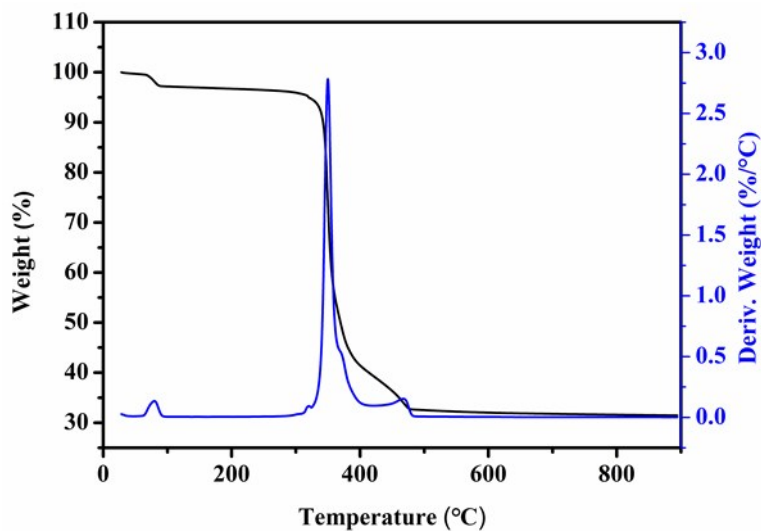

**Fig. S9** TGA/DSC curve of compound **3** (in N<sub>2</sub>).



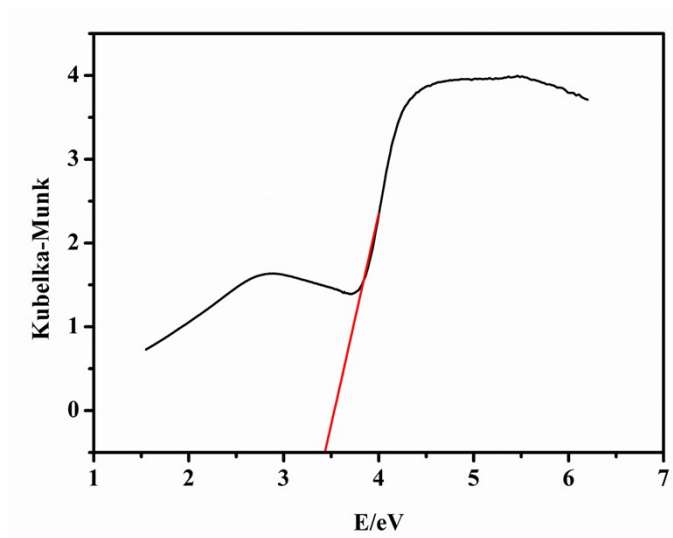

**Fig. S10** Kubelka-Munk function vs energy (eV) of compound **1**.

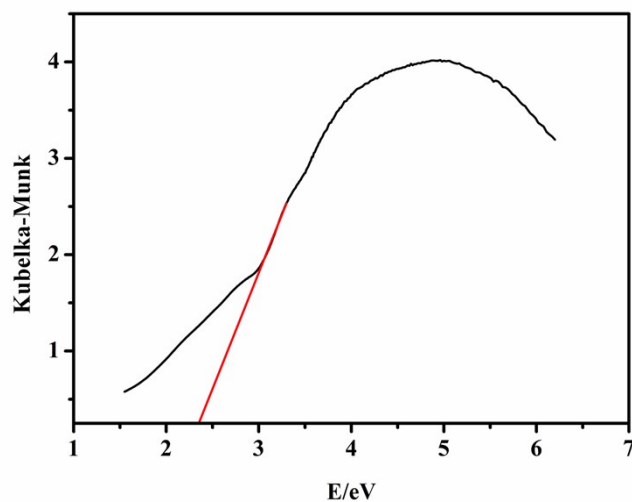

**Fig. S11** Kubelka-Munk function vs energy (eV) of compound **2**.

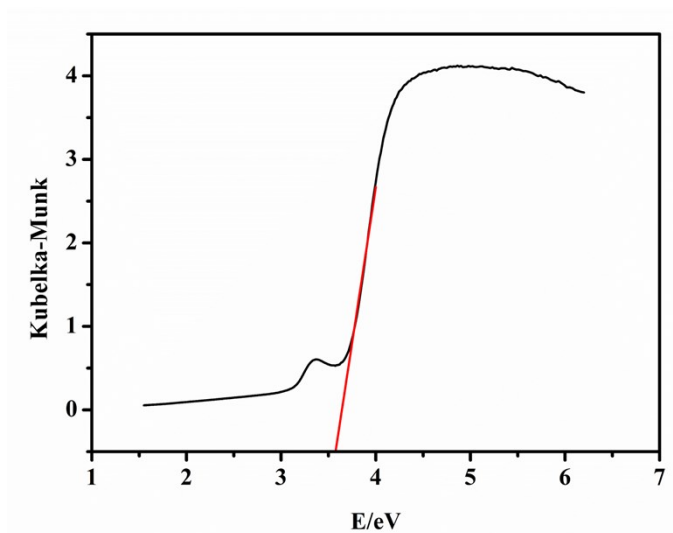

**Fig. S12** Kubelka-Munk function vs energy (eV) of compound **3**.

## Photocurrent measurement

The photocurrent test was carried out on a CHI660E electrochemistry workstation<sup>1</sup> and in a typical three-electrode system. The crystals (10 mg) of compounds **1-3** were dispersed in 1 mL ethanol, the mixture was sonicated for about 30 min and then 50  $\mu\text{L}$  of a dilute solution of 5 naphthol was added to the above mixed solution. Then a 50  $\mu\text{L}$  solution was transferred by Pipetting gun dropped on the cleaned FTO glass, which apply twice in the same way after evaporation under ambient atmosphere. Then a conductive layer of  $0.8 \times 1 \text{ cm}^2$  compounds made of AB glue were transferred into a drying oven and kept at  $65 \text{ }^\circ\text{C}$  for 10 h. The coated film was obtained. The prepared FTO glass film was used as working electrode, platinum wire as the 10 assisting electrode, Ag/AgCl as the reference electrode and keeping the bias voltage at 0.6 V, and a 0.2 M  $\text{Na}_2\text{SO}_4$  aqueous solution was used as the electrolyte.

## Electrochemical measurement

The electrochemical test was carried out on a CHI660E electrochemistry workstation and in a typical three-electrode system. The compound carbon-paper electrodes were used as the working 15 electrode.<sup>2</sup> Hg/HgO electrode was used as a reference electrode and carbon rod as a counter electrode, and a 0.1 M KOH aqueous solution was used as the electrolyte. Additionally, Ag/AgCl electrode was used as a reference electrode and carbon rod as a counter electrode, and 0.01 M  $\text{H}_2\text{SO}_4$  + 0.5 M  $\text{Na}_2\text{SO}_4$  aqueous solution was used as the electrolyte. The crystals (2 mg) of compounds **1-3** were dispersed in 200  $\mu\text{L}$  ethanol. The mixture was sonicated for about 30 min. 20 Then a 200  $\mu\text{L}$  solution was transferred by Pipetting gun dropped on the carbon-paper. Carbon paper ( $0.5 \times 2 \text{ cm}^2$ ) loaded with compounds were transferred into a drying oven and kept at  $80 \text{ }^\circ\text{C}$  for 10 h.

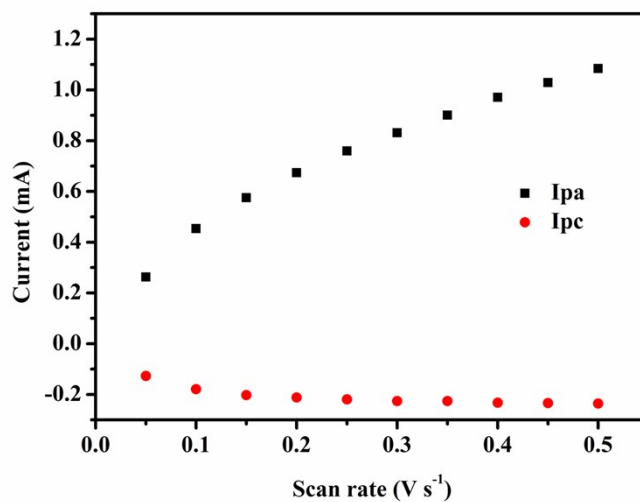

**Fig. S13** The plotting of peak current of CPE-1 anode and cathode versus scanning rate.

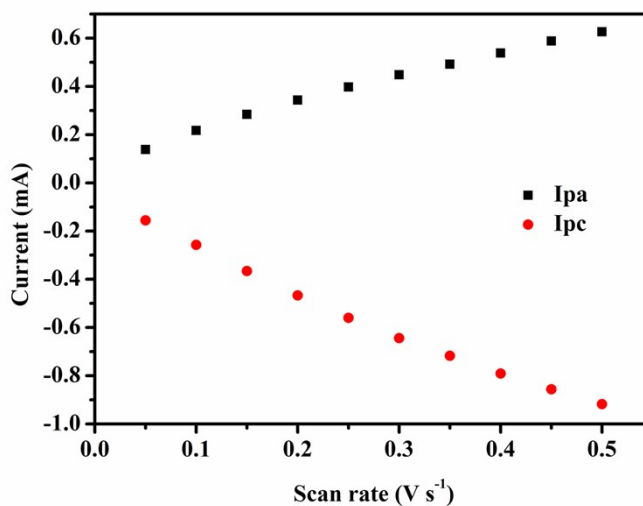

**Fig. S14** The plotting of peak current of CPE-2 anode and cathode versus scanning rate.

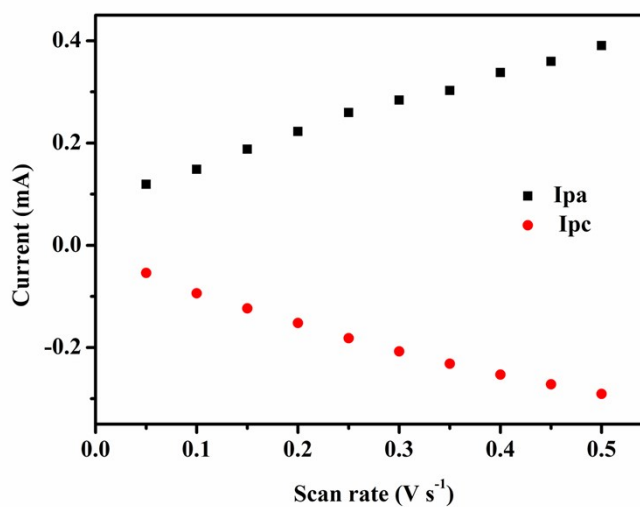

**Fig. S15** The plotting of peak current of CPE-3 anode and cathode versus scanning rate.

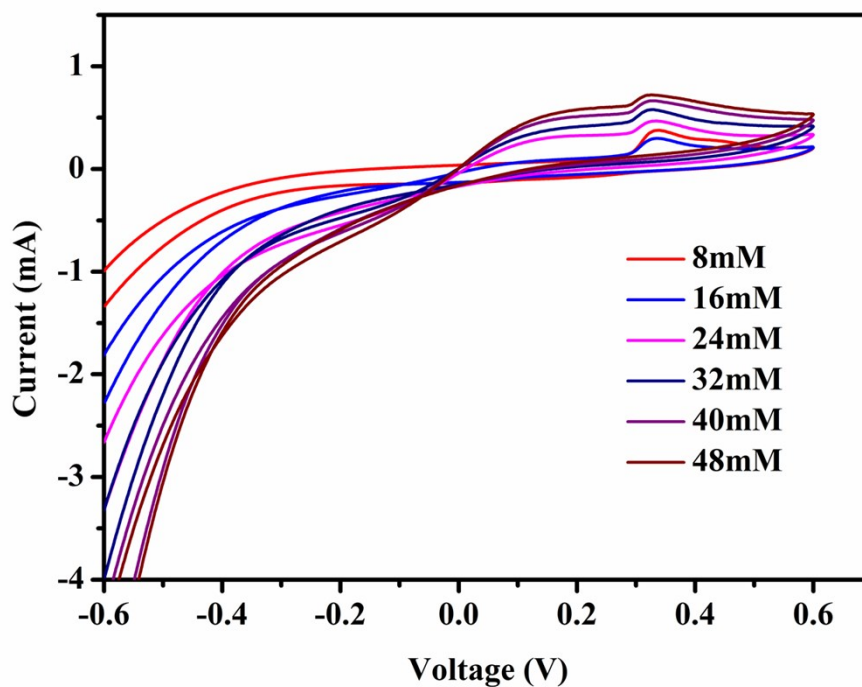

**Fig. S16** Cyclic voltammograms of CPE-1 in 0.01 M  $\text{H}_2\text{SO}_4$  + 0.5 M  $\text{Na}_2\text{SO}_4$  aqueous solution containing different concentrations  $\text{H}_2\text{O}_2$  under the scan rate  $0.2 \text{ V}\cdot\text{s}^{-1}$ .

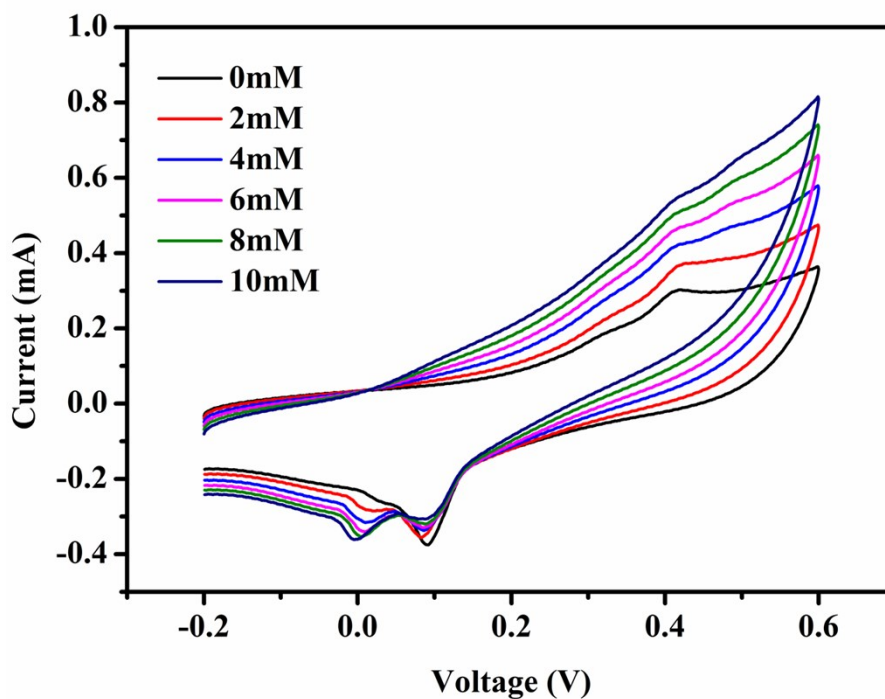

5

**Fig. S17** Cyclic voltammograms of CPE-2 in 0.1 M  $\text{KOH}$  aqueous solution containing different concentrations  $\text{H}_2\text{O}_2$  under the scan rate  $0.2 \text{ V}\cdot\text{s}^{-1}$ .

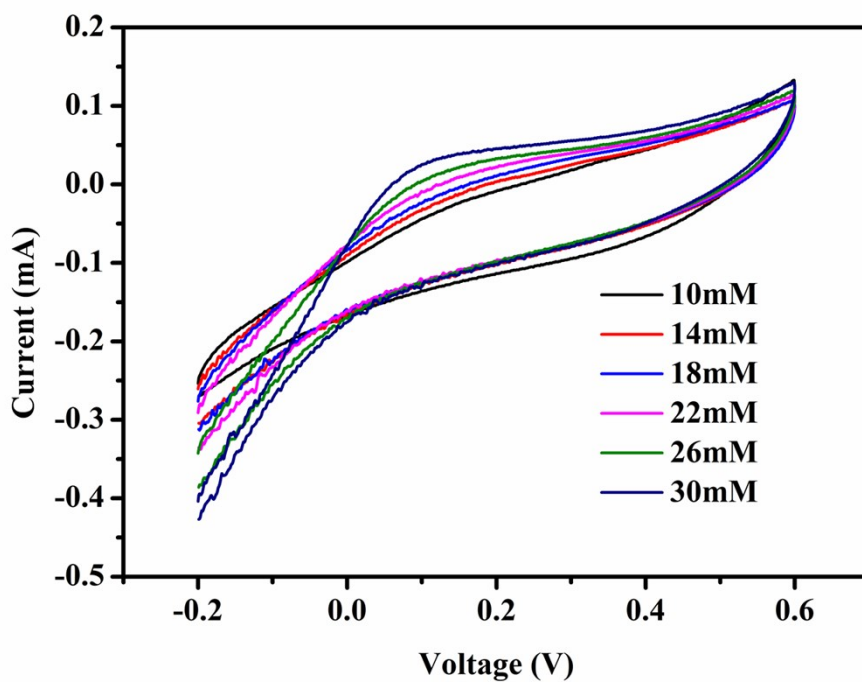

**Fig. S18** Cyclic voltammograms of CPE-3 in 0.01 M  $\text{H}_2\text{SO}_4$  + 0.5 M  $\text{Na}_2\text{SO}_4$  aqueous solution containing different concentrations  $\text{H}_2\text{O}_2$  under the scan rate  $0.2 \text{ V}\cdot\text{s}^{-1}$ .

5

#### 10 Reference:

1. Z. Wang, H.-F. Su, Y.-W. Gong, Q.-P. Qu, Y.-F. Bi, C.-H. Tung, D. Sun and L.-S. Zheng, *Nat. Commun.*, 2020, **11**, 308.
2. P.-P. Zhang, J. Peng, H.-J. Pang, J.-Q. Sha, M. Zhu, D.-D. Wang and M.-G. Liu, *CrystEngComm*, 2011, **13**, 3832-3841.
